# Supplementary material
Source: PubMed Central journal article supplement (PMC1973166)

**Supplemental Experimental Procedures****Chemicals and Antibodies**

Staurosporine, cycloheximide, and zVAD were purchased from Calbiochem (La Jolla, California). Recombinant caspase 3 was purchased from Pharmingen (San Diego, CA). The anti-caspase 3 active fragment, anti-caspase 3, anti-EGFR, anti-HA, anti-Myc antibodies were purchased from Cell Signaling (Danvers, MA). The anti-BACE C-terminal antibody was purchased from Affinity Bioreagents (ABR, Golden, CO). The polyclonal antibody A8717, raised against the C-terminus of APP, and the anti- $\beta$ -tubulin antibody were purchased from Sigma (St Louis, MO). The monoclonal antibody, WO2, raised against 1-17 amino acids of A $\beta$  region was a gift from Dr. Beyreuther. The Asp-1 antibody was purchased from Oncogene (Cambridge MA). The anti-TACE antibody was purchased from Santa Cruz (Santa Cruz, California). The anti-Cu,Zn-SOD antibody was a gift from Dr. Naoyuki Taniguchi. The monoclonal antibodies anti-GGA3 and anti- $\beta$ -catenin were purchased from Transduction Laboratories (Newington, NH). BACE was detected in human brains by SECB1, which recognizes amino acids 296-310 of BACE amino terminus (Li et al., 2004; Yang et al., 2003). The GAPDH antibody was purchased from Chemicon, Temecula CA.

**Cell culture, Western blot analysis, and induction of apoptosis**

H4 human neuroglioma cells expressing APP751 (H4-APP751) and APP-SWE (H4-APPSWE) were grown in DMEM containing 10% FBS, 200  $\mu$ g/mL G418, 250  $\mu$ g/mL zeocin, 2 mM L-glutamine, 100 U/ml penicillin, 100  $\mu$ g/mL streptomycin. For the induction of apoptosis, we used staurosporine or etoposide (Calbiochem). For time-

course experiments, cells were seeded at a density of  $2 \times 10^6$  cells per 100 mm dish and treated with STS (1  $\mu$ M) or etoposide (100  $\mu$ g/mL). In order to inhibit caspase activation a sister plate of cells was pre-treated with zVAD (100  $\mu$ M, Calbiochem) for 1 hr before STS treatment. At different time points (0, 3, 6, 9, 12, and 24 hr), the cells were scraped, centrifuged, and then lysed in buffer containing 1% NP40. Western blot analysis was performed as previously described (Tesco et al., 2003). Densitometry analysis was performed on a Macintosh computer using the public domain NIH Image program (developed at the U.S. National Institutes of Health and available on the Internet at <http://rsb.info.nih.gov/nih-image/>) or using a Versadoc Imager and QuantityOne software (BioRad).

### **RNA Isolation and Northern Blot Analysis**

Total RNA was extracted using TRIZOL (Invitrogen). Northern blot analysis was performed as previously described (Koh et al., 2001). Human cDNA of BACE was labeled with [ $\gamma$ - $^{32}$ P]dCTP (PerkinElmer, Norwalk CT) using random hexanucleotide primers (Prime-a-gene labeling system; Promega Madison WI).

### **Metabolic Labeling and Pulse-Chase Experiments**

H4-APP751 cells were preincubated in methionine/cysteine-free (starve) medium for 30 min, after which they were incubated in starve medium supplemented with 1 mCi of [ $^{35}$ S]methionine/cysteine (Amersham, Piscataway NJ) per well for 60 min (pulse). Then, cells were incubated in the presence of excess amounts of cold methionine/cysteine for indicated time (chase). The cells were then washed, lysed in radioimmunoprecipitation

assay (RIPA) buffer (1% sodium deoxycholate, 0.1% SDS, 1% Triton X-100, 5 mM EDTA, 50 mM Tris, pH 8, 150 mM NaCl), and immunoprecipitated with the specific antibodies. Samples were separated by SDS-PAGE using 4-12% gels, fixed, dried, and exposed to film or a phosphorimaging screen (Bio-Rad). Images were analyzed using a Personal Molecular Imager FX and quantified using Quantity One software (Bio-Rad, Hercules CA). For BACE pulse-chase experiments, the anti-BACE antibodies were unable to immunoprecipitate endogenous BACE. Thus, H4-APP751 cells were transfected with 10  $\mu$ g of pcDNA-BACE-myc cDNA using Superfect (Qiagen, Bothell WA) according to the manufacturer's protocol. 24 hr following transfection, cells were harvested and pooled together to avoid difference in transfection efficiency and plated again. After 24 hr, cells were metabolically labeled as described above.

### **Middle cerebral artery occlusion**

Female Charles River Sprague-Dawley rats (250g, Wilmington, MA) were acclimatized for three days before surgery. Bilateral ovariectomy was performed 2 weeks before MCAO. The University of North Texas Health Science Center Animal Care and Use Committee approved all animal procedures. Ischemic stroke was induced by occlusion of the middle cerebral artery (MCAO) as described before (Wen et al., 2004). The animals were anesthetized and decapitated at the desired time after the onset of reperfusion (12, 24 and 48 hrs). The brains were harvested, separated into ischemic and non-ischemic hemisphere, dissected in cortex (Ctx) and sub-cortex (Suc-Ctx), and frozen in liquid nitrogen. Then, the tissues were homogenized in RIPA buffer and analyzed by WB.

### **Real time PCR**

Total RNA was extracted using RNeasy Mini Kit (Qiagen). Equal quantities of DNase treated RNA samples were subjected to cDNA synthesis using Superscript III Reverse Transcriptase (Invitrogen). Subsequently, SYBR Green Master PCR Mix (Applied Biosystems) and target-specific PCR primers for GGA3 (5'-GGGACAGGGTGTGAGAAAG-3' and 5'-AGAGGGGATCAGCGTCCTAT-3') and GAPDH (5'-GGTCTCCTCTGACTTCAACA-3' and 5'-GTGAGGGTCTCTCTTTCCT-3') were used for amplification of cDNA samples with iCycler real time PCR machine (Bio-Rad). PCR primers were designed to amplify a region flanking two different exons and the target specificity of PCR products were confirmed by sequencing. Standard curve method was used to obtain GAPDH normalized GGA3 values.

### **Site-directed mutagenesis**

Site-directed mutagenesis was performed using QuickChange site-directed mutagenesis kit (Stratagene) according to manufacturer's instructions. The primers used to produce the D313A substitution: (forward) CCTTAACCCTGCCTGCCTCGGAAGGAAAC and (reverse) GTTTCCTTCCGAGGCAGGCAGGGTTAAGG. The primers used to produce D328A mutation were: (forward) GGCACGCTCATCGCCCTTGCGGAGCTGG and (reverse) CCAGCTCCGCAAGGGCGATGAGCGTGCC. The primers used to produce D333A mutation were: (forward) GACCTTGCGGAGCTGGCCACGACCAACAG and (reverse) CTGTTGGTCGTGGCCAGCTCCGCAAGGTC. The primers used to produce D428A mutation were: (forward) CAGTCCGACCTGGCCTTCTTCAGCCCC and

(reverse) GGGGCTGAAGAAGGCCAGGTCGGACTG. The GGA3DN was produced with the introduction of a stop codon. The primers used to produce GGA3DN were: (forward) CCCTGCCTGACTAGGAAGGAAACAGTCAGTGC and (reverse) GCACTGACTGTTTCCTTCCTAGTCAGGCAGGG. The resulting cDNA constructs were sequenced for verification.

### **Lentiviral RNAi**

Custom-designed lentiviral vectors (pLKO.1) carrying expression cassettes that express shRNAs that target human and mouse GGA3 gene were purchased from Sigma. The packaging of the virus was performed as previously described (Sena-Esteves et al., 2004)

## References

- Abrahamson, E. E., Ikonovic, M. D., Ciallella, J. R., Hope, C. E., Paljug, W. R., Isanski, B. A., Flood, D. G., Clark, R. S., and Dekosky, S. T. (2006). Caspase inhibition therapy abolishes brain trauma-induced increases in Abeta peptide: Implications for clinical outcome. *Exp Neurol* 197, 437-450.
- Banati, R. B., Gehrman, J., Wiessner, C., Hossmann, K. A., and Kreutzberg, G. W. (1995). Glial expression of the beta-amyloid precursor protein (APP) in global ischemia. *J Cereb Blood Flow Metab* 15, 647-654.
- Barnes, N. Y., Li, L., Yoshikawa, K., Schwartz, L. M., Oppenheim, R. W., and Milligan, C. E. (1998). Increased production of amyloid precursor protein provides a substrate for caspase-3 in dying motoneurons. *J Neurosci* 18, 5869-5880.
- Brancolini, C., Sgorbissa, A., and Schneider, C. (1998). Proteolytic processing of the adherens junctions components beta-catenin and gamma-catenin/plakoglobin during apoptosis. *Cell Death Differ* 5, 1042-1050.
- Chen, X. H., Siman, R., Iwata, A., Meaney, D. F., Trojanowski, J. Q., and Smith, D. H. (2004). Long-term accumulation of amyloid-beta, beta-secretase, presenilin-1, and caspase-3 in damaged axons following brain trauma. *Am J Pathol* 165, 357-371.
- Cribbs, D. H., Poon, W. W., Rissman, R. A., and Blurton-Jones, M. (2004). Caspase-mediated degeneration in Alzheimer's disease. *Am J Pathol* 165, 353-355.
- Davoli, M. A., Fourtounis, J., Tam, J., Xanthoudakis, S., Nicholson, D., Robertson, G. S., Ng, G. Y., and Xu, D. (2002). Immunohistochemical and biochemical assessment of caspase-3 activation and DNA fragmentation following transient focal ischemia in the rat. *Neuroscience* 115, 125-136.
- Galli, C., Piccini, A., Ciotti, M. T., Castellani, L., Calissano, P., Zaccheo, D., and Tabaton, M. (1998). Increased amyloidogenic secretion in cerebellar granule cells undergoing apoptosis. *Proc Natl Acad Sci U S A* 95, 1247-1252.
- Grupe, A., Li, Y., Rowland, C., Nowotny, P., Hinrichs, A. L., Smemo, S., Kauwe, J. S., Maxwell, T. J., Cherny, S., Doil, L., *et al.* (2006). A scan of chromosome 10 identifies a novel locus showing strong association with late-onset Alzheimer disease. *Am J Hum Genet* 78, 78-88.
- Guo, Q., Xie, J., Chang, X., and Du, H. (2001). Prostate apoptosis response-4 enhances secretion of amyloid beta peptide 1-42 in human neuroblastoma IMR-32 cells by a caspase-dependent pathway. *J Biol Chem* 276, 16040-16044.
- Kim, H. S., Lee, S. H., Kim, S. S., Kim, Y. K., Jeong, S. J., Ma, J., Han, D. H., Cho, B. K., and Suh, Y. H. (1998). Post-ischemic changes in the expression of Alzheimer's APP isoforms in rat cerebral cortex. *Neuroreport* 9, 533-537.
- Koh, Y. H., Suzuki, K., Che, W., Park, Y. S., Miyamoto, Y., Higashiyama, S., and Taniguchi, N. (2001). Inactivation of glutathione peroxidase by NO leads to the accumulation of H<sub>2</sub>O<sub>2</sub> and the induction of HB-EGF via c-Jun NH<sub>2</sub>-terminal kinase in rat aortic smooth muscle cells. *Faseb J* 15, 1472-1474.
- Koistinaho, J., Pyykonen, I., Keinanen, R., and Hokfelt, T. (1996). Expression of beta-amyloid precursor protein mRNAs following transient focal ischaemia. *Neuroreport* 7, 2727-2731.

Lane, J. D., Lucocq, J., Pryde, J., Barr, F. A., Woodman, P. G., Allan, V. J., and Lowe, M. (2002). Caspase-mediated cleavage of the stacking protein GRASP65 is required for Golgi fragmentation during apoptosis. *J Cell Biol* 156, 495-509.

Li, Y., Grupe, A., Rowland, C., Nowotny, P., Kauwe, J. S., Smemo, S., Hinrichs, A., Tacey, K., Toombs, T. A., Kwok, S., *et al.* (2006). DAPK1 variants are associated with Alzheimer's disease and allele-specific expression. *Hum Mol Genet* 15, 2560-2568.

Li, Y., Nowotny, P., Holmans, P., Smemo, S., Kauwe, J. S., Hinrichs, A. L., Tacey, K., Doil, L., van Luchene, R., Garcia, V., *et al.* (2004b). Association of late-onset Alzheimer's disease with genetic variation in multiple members of the GAPD gene family. *Proc Natl Acad Sci U S A* 101, 15688-15693.

Liu, R., Yang, S. H., Perez, E., Yi, K. D., Wu, S. S., Eberst, K., Prokai, L., Prokai-Tatrai, K., Cai, Z. Y., Covey, D. F., *et al.* (2002). Neuroprotective effects of a novel non-receptor-binding estrogen analogue: in vitro and in vivo analysis. *Stroke* 33, 2485-2491.

Nolan, K. A., Lino, M. M., Seligmann, A. W., and Blass, J. P. (1998). Absence of vascular dementia in an autopsy series from a dementia clinic. *J Am Geriatr Soc* 46, 597-604.

Pastorino, L., Ikin, A. F., Nairn, A. C., Pursnani, A., and Buxbaum, J. D. (2002). The carboxyl-terminus of BACE contains a sorting signal that regulates BACE trafficking but not the formation of total A(beta). *Mol Cell Neurosci* 19, 175-185.

Pellegrini, L., Passer, B. J., Tabaton, M., Ganjei, J. K., and D'Adamio, L. (1999). Alternative, non-secretase processing of Alzheimer's beta-amyloid precursor protein during apoptosis by caspase-6 and -8. *J Biol Chem* 274, 21011-21016.

Petrovitch, H., Ross, G. W., Steinhorn, S. C., Abbott, R. D., Markesbery, W., Davis, D., Nelson, J., Hardman, J., Masaki, K., Vogt, M. R., *et al.* (2005). AD lesions and infarcts in demented and non-demented Japanese-American men. *Ann Neurol* 57, 98-103.

Riekse, R. G., Leverenz, J. B., McCormick, W., Bowen, J. D., Teri, L., Nochlin, D., Simpson, K., Eugenio, C., Larson, E. B., and Tsuang, D. (2004). Effect of vascular lesions on cognition in Alzheimer's disease: a community-based study. *J Am Geriatr Soc* 52, 1442-1448.

Sena-Esteves, M., Tebbets, J. C., Steffens, S., Crombleholme, T., and Flake, A. W. (2004). Optimized large-scale production of high titer lentivirus vector pseudotypes. *J Virol Methods* 122, 131-139.

Shi, J., Yang, S. H., Stuble, L., Day, A. L., and Simpkins, J. W. (2000). Hypoperfusion induces overexpression of beta-amyloid precursor protein mRNA in a focal ischemic rodent model. *Brain Res* 853, 1-4.

Sodhi, C. P., Rampalli, S., Perez, R. G., Koo, E. H., Quinn, B., and Gottardi-Littell, N. R. (2004). The endocytotic pathway is required for increased A beta 42 secretion during apoptosis. *Brain Res Mol Brain Res* 128, 201-211.

Stephenson, D. T., Rash, K., and Clemens, J. A. (1992). Amyloid precursor protein accumulates in regions of neurodegeneration following focal cerebral ischemia in the rat. *Brain Res* 593, 128-135.

Tamagno, E., Bardini, P., Obbili, A., Vitali, A., Borghi, R., Zaccheo, D., Pronzato, M. A., Danni, O., Smith, M. A., Perry, G., and Tabaton, M. (2002). Oxidative stress

increases expression and activity of BACE in NT2 neurons. *Neurobiol Dis* *10*, 279-288.

Tamagno, E., Guglielmotto, M., Bardini, P., Santoro, G., Davit, A., Di Simone, D., Danni, O., and Tabaton, M. (2003). Dehydroepiandrosterone reduces expression and activity of BACE in NT2 neurons exposed to oxidative stress. *Neurobiol Dis* *14*, 291-301.

Tamagno, E., Parola, M., Bardini, P., Piccini, A., Borghi, R., Guglielmotto, M., Santoro, G., Davit, A., Danni, O., Smith, M. A., *et al.* (2005). Beta-site APP cleaving enzyme up-regulation induced by 4-hydroxynonenal is mediated by stress-activated protein kinases pathways. *J Neurochem* *92*, 628-636.

Tong, Y., Zhou, W., Fung, V., Christensen, M. A., Qing, H., Sun, X., and Song, W. (2005). Oxidative stress potentiates BACE1 gene expression and A $\beta$  generation. *J Neural Transm* *112*, 455-469.

Tyler, S. J., Dawbarn, D., Wilcock, G. K., and Allen, S. J. (2002). alpha- and beta-secretase: profound changes in Alzheimer's disease. *Biochem Biophys Res Commun* *299*, 373-376.

Wakita, H., Tomimoto, H., Akiguchi, I., Ohnishi, K., Nakamura, S., and Kimura, J. (1992). Regional accumulation of amyloid beta/A4 protein precursor in the gerbil brain following transient cerebral ischemia. *Neurosci Lett* *146*, 135-138.

Weidemann, A., Paliga, K., Durrwang, U., Reinhard, F. B., Schuckert, O., Evin, G., and Masters, C. L. (1999). Proteolytic processing of the Alzheimer's disease amyloid precursor protein within its cytoplasmic domain by caspase-like proteases. *J Biol Chem* *274*, 5823-5829.



## Supplemental Figure Legend

### **Fig. 1 Depletion of GGA3 by siRNA increases EGFR levels**

A-B: the graph represents mean  $\pm$  SEM of 4 measurements of GGA3 or EGFR protein levels, respectively, in H4-APP751 cells treated with siGGA3 or siNeg. Levels of EGFR were measured 72 hr after BACE and siGGA3 or siNeg co-transfection. Densitometry was performed using Versadoc Imager and QuantityOne software (Bio-Rad). GGA3 or EGFR densitometry values were normalized against GAPDH values. Mann-Whitney test was used for statistical analysis.

### **Fig. 2 Depletion of GGA3 by lentiviral RNAi increases both ectopically expressed and endogenous BACE in N2A cells**

A: Murine N2A cells were infected with lentivirus expressing either shRNA negative control or shRNA for murine GGA3 gene. Three different murine shRNA lentivirus were tested. After 72 hr, myc-tagged BACE vector was transfected in N2A cells. After additional 72 hr, GGA3 protein levels were determined by WB with anti-GGA3 antibody (Trasduction Laboratories). BACE protein levels were detected by WB using anti-myc polyclonal antibody (Cell signaling). GAPDH was used as loading control. B-C: the graphs represent mean  $\pm$  SEM of 4 GGA3 or BACE levels measurements, respectively. Densitometry was performed using Versadoc Imager and QuantityOne software (Bio-Rad). GGA3 and BACE densitometry values were normalized against GAPDH values. The levels of GGA3 were 40% and 20% in cells infected with 310 or 306 lentivirus, respectively, compared to levels in cells infected with negative control virus. The levels

of BACE were 150% and 200% in cells infected with 310 or 306 lentivirus, respectively, compared to levels in cells infected with negative control virus. D: N2A cells were infected as described above. After 72 hr GGA3 protein levels were determined by WB with anti-GGA3 antibody (Trasduction Laboratories). Endogenous BACE protein levels were detected by WB using anti-BACE polyclonal antibody (Affinity Bioreagents). GAPDH was used as loading control. E: the graph represents mean  $\pm$  SEM of 3 BACE levels measurements,. Densitometry was performed using Versadoc Imager and QuantityOne software (Bio-Rad). GGA3 and BACE densitometry values were normalized against GAPDH values. The levels of endogenous BACE were 140% in cells infected with 306 lentivirus, compared to levels in cells infected with negative control virus.

**Fig. 3 Depletion of GGA3 affects APP processing independently of  $\gamma$ -secretase activity**

A: H4 cells expressing either APP-751 or the APP-CTF (APP105) were infected with lentivirus expressing either shRNA negative control or shRNA for human GGA3. After 72 hr, GGA3 protein levels were determined by WB with anti-GGA3 antibody (Trasduction Laboratories). GAPDH was used as loading control. B-C: the graphs represent mean  $\pm$  SEM of 6 A $\beta$ 40 measurements by ELISA in H4-APP751 or H4-APP105 APPSWE, respectively. A $\beta$  concentration was normalized against the concentration of protein in cell lysates. Unpaired T-test with Welch correction was used for statistical analysis.

**Fig. 4 Levels of GGA3 are decreased in AD cerebellum**

A: Western Blot analysis of cerebellum of human brains. AD = Alzheimer's disease. ND = non-demented control. BACE was detected by SECB1. GGA3 was detected by anti-GGA3 antibody. GAPDH was used as loading control. B-C. BACE and GGA3 densitometry values were normalized against GAPDH values. At least triplicate of each samples were analyzed. The graphs represent mean  $\pm$  SEM of 18 ND and 18 AD. Unpaired t-test and unpaired t-test with Welch correction were used to perform statistical analysis of BACE and GGA3 levels, respectively. D-E. Linear correlation analysis between GGA3 levels in temporal cortex (TC) and cerebellum in ND and AD, respectively. The dotted line indicates the 95% confidence interval. F: the graph represents the distribution of AD versus ND relative to levels of GGA3 both in TC and cerebellum.

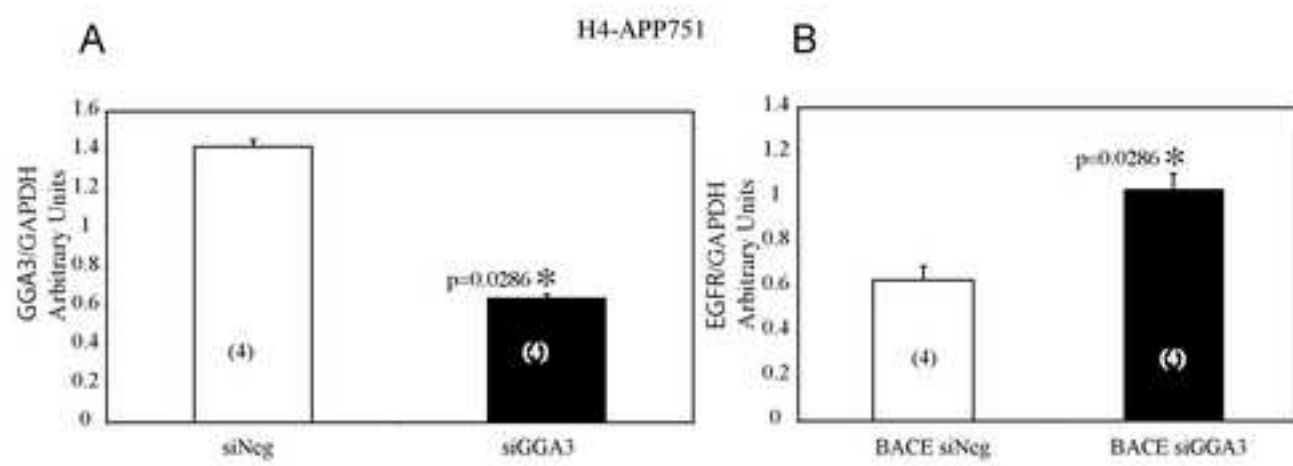

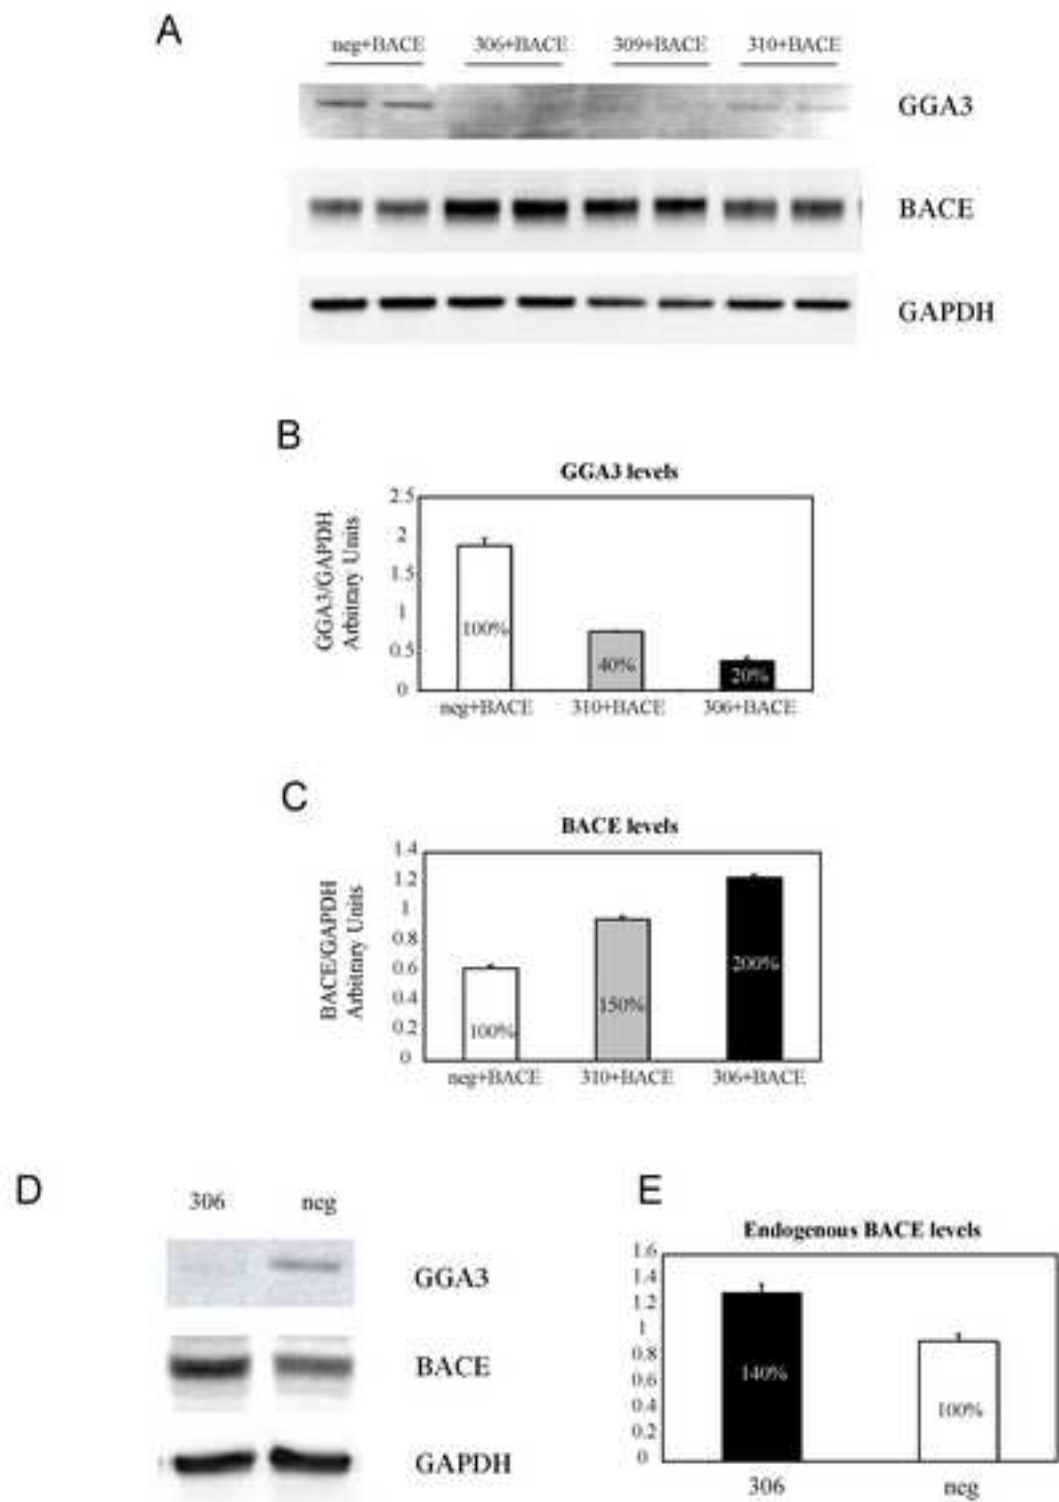

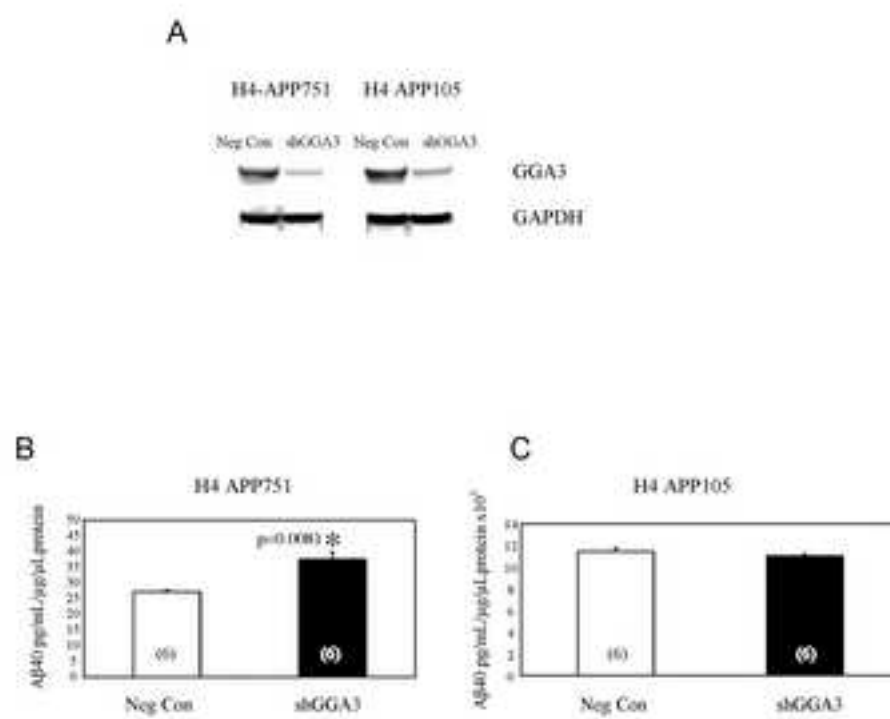

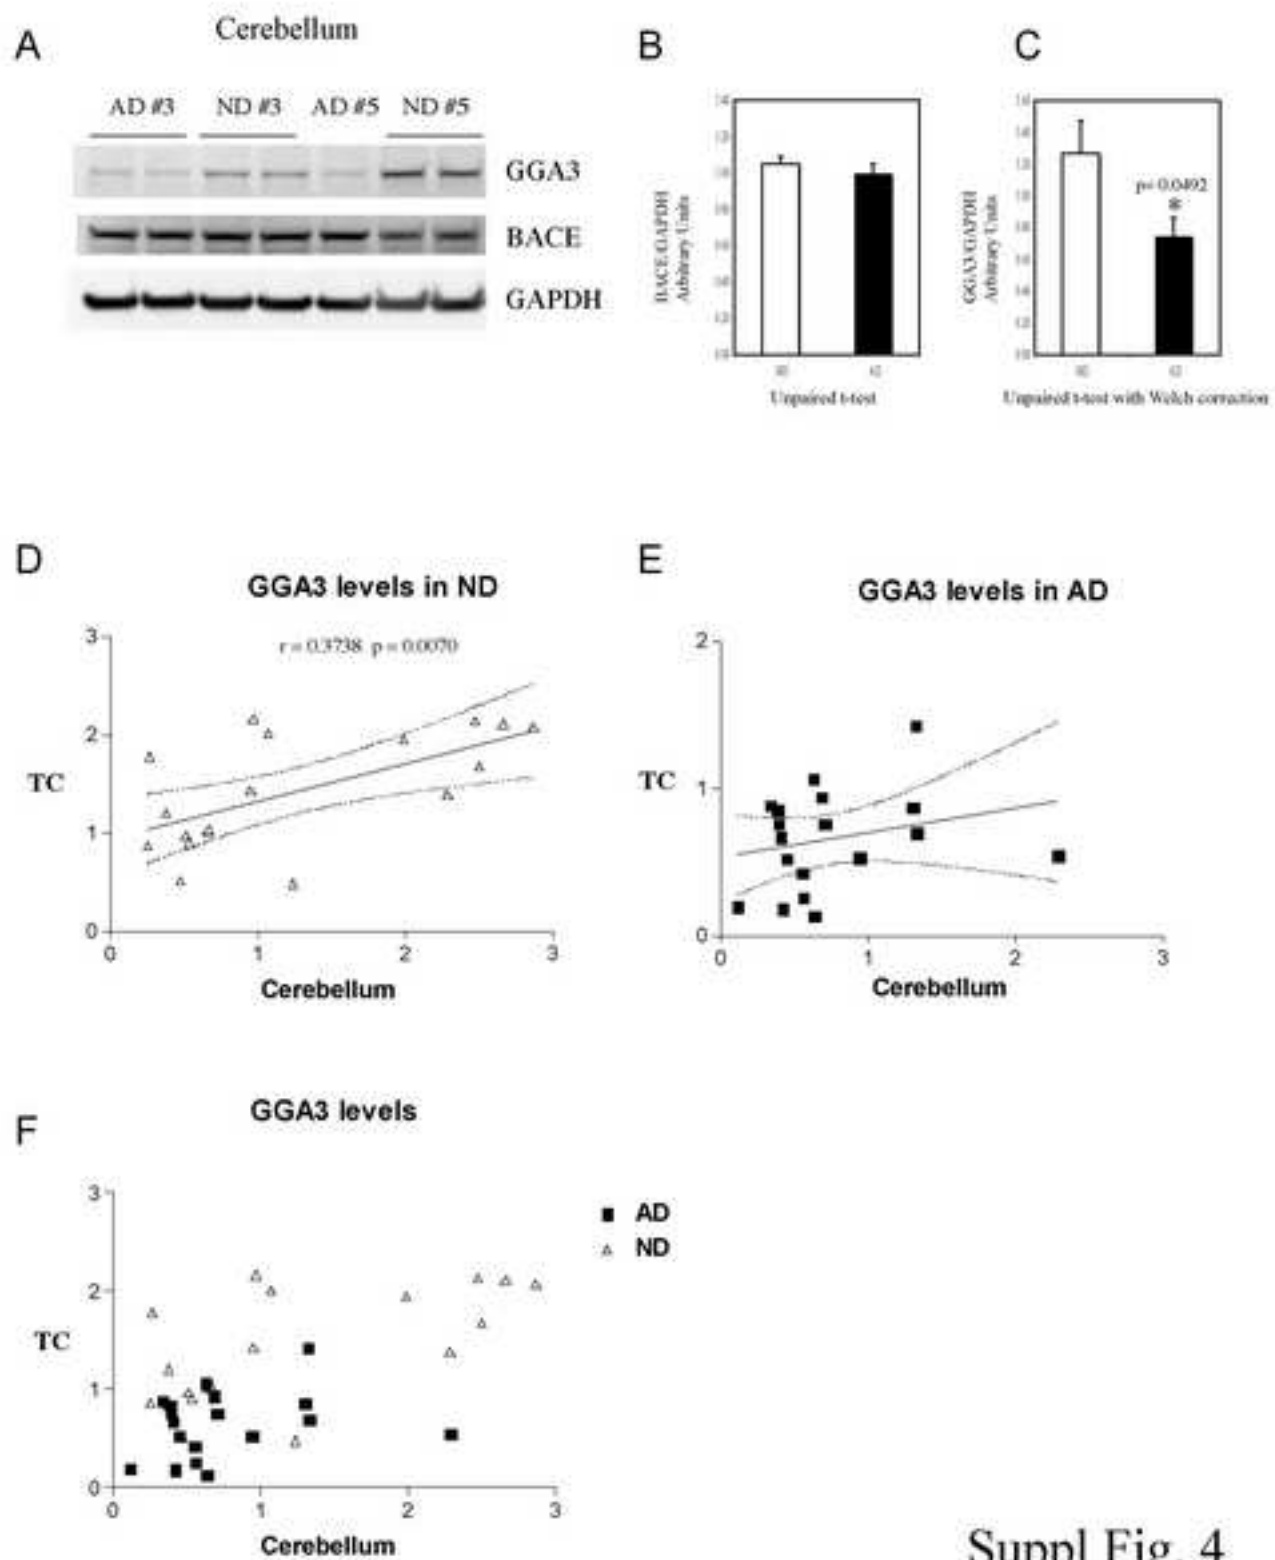

Supplement: NIHMS25291-supplement-01.pdf [file NIHMS25291-supplement-01.pdf]
